# Supplementary material
Source: publisher figshare collection journal article supplement (https://wellcome.figshare.com/ndownloader/files/9821920)
Supplement: Supplementary file 1 [file 9821920]

Article URL	Volume	Publication Number	Article Type	Version Number	Submission date	Prepub Checks With Authors	Author Revisions Received	Sent To Typesetters	Pdf Proofs To Authors	Published	Referee Report 1	Referee Report 2	Referee Report 3	Referee Report 4	Indexed	Referee Status	Article Length
https://wellcomeopenresearch.org/articles/1-1/v1	1	1	RESEARCH_ARTICLE	1	18/10/2016	18/10/2016		25/10/2016	28/10/2016	15/11/2016	05/12/2016	08/12/2016	12/12/2016		12/12/2016	A3, AR0, NA0	WC_2500_8000
https://wellcomeopenresearch.org/articles/1-1/v2	1	1	RESEARCH_ARTICLE	2	06/02/2017			10/02/2017	14/02/2017	27/02/2017	05/12/2016	08/12/2016	12/12/2016		12/12/2016	A3, AR0, NA0	WC_2500_8000
https://wellcomeopenresearch.org/articles/1-2/v1	1	2	METHOD_ARTICLE	1	17/10/2016		20/10/2016	26/10/2016	27/10/2016	15/11/2016	22/11/2016	01/12/2016	06/12/2016	09/12/2016	01/12/2016	A4, AR0, NA0	WC_1000_2500
https://wellcomeopenresearch.org/articles/1-2/v2	1	2	METHOD_ARTICLE	2	10/04/2017			12/04/2017	13/04/2017	24/04/2017	22/11/2016	01/12/2016	06/12/2016	09/12/2016	01/12/2016	A4, AR0, NA0	WC_1000_2500
https://wellcomeopenresearch.org/articles/1-3/v1	1	3	RESEARCH_NOTE	1	19/10/2016		20/10/2016	26/10/2016	27/10/2016	15/11/2016	28/11/2016	09/12/2016			17/02/2017	A2, AR0, NA0	WC_1000_2500
https://wellcomeopenresearch.org/articles/1-3/v2	1	3	RESEARCH_NOTE	2	26/01/2017			10/02/2017	13/02/2017	17/02/2017	28/11/2016	09/12/2016			17/02/2017	A2, AR0, NA0	WC_1000_2500
https://wellcomeopenresearch.org/articles/1-4/v1	1	4	DATA_NOTE	1	17/10/2016	18/10/2016		27/10/2016	28/10/2016	15/11/2016	12/12/2016	19/12/2016			19/12/2016	A2, AR0, NA0	WC_1000_2500
https://wellcomeopenresearch.org/articles/1-5/v1	1	5	METHOD_ARTICLE	1	18/10/2016		20/10/2016	07/11/2016	08/11/2016	15/11/2016	28/11/2016	01/12/2016	19/12/2016		01/12/2016	A3, AR0, NA0	WC_2500_8000
https://wellcomeopenresearch.org/articles/1-6/v1	1	6	SOFTWARE_TOOLS	1	19/10/2016	21/10/2016		27/10/2016	31/10/2016	15/11/2016	28/11/2016	30/11/2016			30/11/2016	A2, AR0, NA0	WC_2500_8000
https://wellcomeopenresearch.org/articles/1-6/v2	1	6	SOFTWARE_TOOLS	2	27/02/2017			01/03/2017	03/03/2017	13/03/2017	28/11/2016	30/11/2016			30/11/2016	A2, AR0, NA0	WC_2500_8000
https://wellcomeopenresearch.org/articles/1-7/v1	1	7	STUDY_PROTOCOL	1	25/10/2016		26/10/2016	26/10/2016	31/10/2016	15/11/2016	21/12/2016	23/12/2016	16/01/2017		23/12/2016	A3, AR0, NA0	WC_OVER_8000
https://wellcomeopenresearch.org/articles/1-7/v2	1	7	STUDY_PROTOCOL	2	18/01/2017			20/01/2017	23/01/2017	26/01/2017	21/12/2016	23/12/2016	16/01/2017		23/12/2016	A3, AR0, NA0	WC_OVER_8000
https://wellcomeopenresearch.org/articles/1-8/v1	1	8	RESEARCH_ARTICLE	1	21/10/2016		24/10/2016	25/10/2016	26/10/2016	15/11/2016	21/11/2016	22/11/2016	28/11/2016	09/12/2016	22/11/2016	A4, AR0, NA0	WC_2500_8000
https://wellcomeopenresearch.org/articles/1-9/v1	1	9	DATA_NOTE	1	20/10/2016	21/10/2016		01/11/2016	02/11/2016	15/11/2016	24/11/2016	01/12/2016	05/12/2016		05/12/2016	A2, AR1, NA0	WC_1000_2500
https://wellcomeopenresearch.org/articles/1-10/v1	1	10	RESEARCH_ARTICLE	1	21/10/2016		21/10/2016	25/10/2016	26/10/2016	15/11/2016	18/11/2016	21/11/2016	12/12/2016		12/12/2016	A3, AR0, NA0	WC_2500_8000
https://wellcomeopenresearch.org/articles/1-10/v2	1	10	RESEARCH_ARTICLE	2	15/12/2016			19/12/2016	21/12/2016	23/12/2016	18/11/2016	21/11/2016	12/12/2016		12/12/2016	A3, AR0, NA0	WC_2500_8000
https://wellcomeopenresearch.org/articles/1-11/v1	1	11	RESEARCH_ARTICLE	1	20/10/2016	24/10/2016		04/11/2016	08/11/2016	15/11/2016	13/12/2016	16/12/2016			16/12/2016	A2, AR0, NA0	WC_2500_8000
https://wellcomeopenresearch.org/articles/1-12/v1	1	12	DATA_NOTE	1	24/10/2016	27/10/2016	31/10/2016	01/11/2016	02/11/2016	15/11/2016	21/11/2016	24/11/2016	25/11/2016	28/11/2016	24/11/2016	A4, AR0, NA0	WC_1000_2500
https://wellcomeopenresearch.org/articles/1-13/v1	1	13	METHOD_ARTICLE	1	26/10/2016		26/10/2016	27/10/2016	31/10/2016	15/11/2016	23/11/2016	28/11/2016			28/11/2016	A2, AR0, NA0	WC_2500_8000
https://wellcomeopenresearch.org/articles/1-14/v1	1	14	SOFTWARE_TOOLS	1	25/10/2016	27/10/2016		03/11/2016	04/11/2016	15/11/2016	25/11/2016	28/11/2016	30/11/2016		30/11/2016	A2, AR1, NA0	WC_UPTO_1000
https://wellcomeopenresearch.org/articles/1-15/v1	1	15	RESEARCH_ARTICLE	1	17/10/2016	19/10/2016		26/10/2016	27/10/2016	15/11/2016	05/12/2016	05/12/2016	20/03/2017			A1, AR1, NA1	WC_2500_8000
https://wellcomeopenresearch.org/articles/1-16/v1	1	16	RESEARCH_NOTE	1	01/11/2016	01/11/2016		07/11/2016	08/11/2016	16/11/2016	21/11/2016	02/12/2016	05/12/2016		11/01/2017	A3, AR0, NA0	WC_UPTO_1000
https://wellcomeopenresearch.org/articles/1-16/v2	1	16	RESEARCH_NOTE	2	03/01/2017	03/01/2017		04/01/2017	05/01/2017	09/01/2017	21/11/2016	02/12/2016	05/12/2016		11/01/2017	A3, AR0, NA0	WC_UPTO_1000
https://wellcomeopenresearch.org/articles/1-17/v1	1	17	RESEARCH_ARTICLE	1	18/10/2016	20/10/2016	07/11/2016	09/11/2016	11/11/2016	17/11/2016	24/11/2016	05/12/2016	19/12/2016		19/12/2016	A1, AR2, NA0	WC_1000_2500
https://wellcomeopenresearch.org/articles/1-18/v1	1	18	RESEARCH_ARTICLE	1	28/10/2016	31/10/2016	04/11/2016	07/11/2016	10/11/2016	18/11/2016	14/12/2016	15/12/2016	16/12/2016	19/12/2016	16/12/2016	A4, AR0, NA0	WC_OVER_8000
https://wellcomeopenresearch.org/articles/1-18/v2	1	18	RESEARCH_ARTICLE	2	12/06/2017			13/06/2017	14/06/2017	21/06/2017	14/12/2016	15/12/2016	16/12/2016	19/12/2016	16/12/2016	A4, AR0, NA0	WC_OVER_8000
https://wellcomeopenresearch.org/articles/1-19/v1	1	19	METHOD_ARTICLE	1	28/10/2016	01/11/2016	03/11/2016	04/11/2016	08/11/2016	23/11/2016	05/12/2016	05/12/2016			16/01/2017	A2, AR0, NA0	WC_2500_8000
https://wellcomeopenresearch.org/articles/1-19/v2	1	19	METHOD_ARTICLE	2	22/12/2016			23/12/2016	28/12/2016	03/01/2017	05/12/2016	05/12/2016			16/01/2017	A2, AR0, NA0	WC_2500_8000
https://wellcomeopenresearch.org/articles/1-19/v3	1	19	METHOD_ARTICLE	3	02/05/2017			03/05/2017	04/05/2017	05/05/2017	05/12/2016	05/12/2016			16/01/2017	A2, AR0, NA0	WC_2500_8000
https://wellcomeopenresearch.org/articles/1-20/v1	1	20	METHOD_ARTICLE	1	02/11/2016	04/11/2016		22/11/2016	23/11/2016	25/11/2016	01/03/2017	12/04/2017			12/04/2017	A2, AR0, NA0	WC_2500_8000
https://wellcomeopenresearch.org/articles/1-21/v1	1	21	RESEARCH_ARTICLE	1	24/11/2016	24/11/2016		30/11/2016	01/12/2016	06/12/2016	01/02/2017	23/02/2017			23/02/2017	A2, AR0, NA0	WC_1000_2500
https://wellcomeopenresearch.org/articles/1-22/v1	1	22	RESEARCH_NOTE	1	16/11/2016	17/11/2016	17/11/2016	28/11/2016	30/11/2016	06/12/2016	08/12/2016	16/01/2017			16/01/2017	A2, AR0, NA0	WC_1000_2500
https://wellcomeopenresearch.org/articles/1-22/v2	1	22	RESEARCH_NOTE	2	14/02/2017			16/02/2017	17/02/2017	21/02/2017	08/12/2016	16/01/2017			16/01/2017	A2, AR0, NA0	WC_1000_2500
https://wellcomeopenresearch.org/articles/1-23/v1	1	23	METHOD_ARTICLE	1	20/11/2016	22/11/2016		28/11/2016	30/11/2016	09/12/2016	20/01/2017	19/04/2017	10/05/2017		10/05/2017	A1, AR2, NA0	WC_2500_8000
https://wellcomeopenresearch.org/articles/1-23/v2	1	23	METHOD_ARTICLE	2	06/03/2017			09/03/2017	13/03/2017	17/03/2017	20/01/2017	19/04/2017	10/05/2017		10/05/2017	A1, AR2, NA0	WC_2500_8000
https://wellcomeopenresearch.org/articles/1-24/v1	1	24	METHOD_ARTICLE	1	01/11/2016	03/11/2016		02/12/2016	05/12/2016	09/12/2016	23/12/2016	18/01/2017	13/03/2017		13/03/2017	A1, AR2, NA0	WC_2500_8000
https://wellcomeopenresearch.org/articles/1-25/v1	1	25	SOFTWARE_TOOLS	1	14/11/2016	15/11/2016		02/12/2016	05/12/2016	12/12/2016	13/01/2017	17/01/2017	18/07/2017		18/07/2017	A2, AR1, NA0	WC_2500_8000
https://wellcomeopenresearch.org/articles/1-25/v2	1	25	SOFTWARE_TOOLS	2	04/07/2017			05/07/2017	06/07/2017	10/07/2017	13/01/2017	17/01/2017	18/07/2017		18/07/2017	A2, AR1, NA0	WC_2500_8000
https://wellcomeopenresearch.org/articles/1-26/v1	1	26	METHOD_ARTICLE	1	25/11/2016	28/11/2016		08/12/2016	09/12/2016	13/12/2016	21/12/2016	05/01/2017	05/01/2017	11/01/2017	05/01/2017	A3, AR1, NA0	WC_2500_8000
https://wellcomeopenresearch.org/articles/1-27/v1	1	27	RESEARCH_ARTICLE	1	18/11/2016	21/11/2016		02/12/2016	05/12/2016	14/12/2016	23/12/2016	30/12/2016	03/01/2017	31/01/2017	03/01/2017	A3, AR1, NA0	WC_2500_8000
https://wellcomeopenresearch.org/articles/1-27/v2	1	27	RESEARCH_ARTICLE	2	26/01/2017	27/01/2017		30/01/2017	31/01/2017	13/03/2017	23/12/2016	30/12/2016	03/01/2017	31/01/2017	03/01/2017	A3, AR1, NA0	WC_2500_8000
https://wellcomeopenresearch.org/articles/1-28/v1	1	28	RESEARCH_ARTICLE	1	11/11/2016	15/11/2016		07/12/2016	08/12/2016	14/12/2016	19/12/2016	30/01/2017			30/01/2017	A2, AR0, NA0	WC_2500_8000
https://wellcomeopenresearch.org/articles/1-28/v2	1	28	RESEARCH_ARTICLE	2	22/02/2017			24/02/2017	27/02/2017	03/03/2017	19/12/2016	30/01/2017			30/01/2017	A2, AR0, NA0	WC_2500_8000
https://wellcomeopenresearch.org/articles/1-29/v1	1	29	STUDY_PROTOCOL	1	21/10/2016	27/10/2016	03/11/2016	07/11/2016	08/11/2016	15/12/2016	03/01/2017	11/01/2017			11/01/2017	A2, AR0, NA0	WC_1000_2500
https://wellcomeopenresearch.org/articles/1-30/v1	1	30	RESEARCH_NOTE	1	03/11/2016	08/11/2016		01/12/2016	01/12/2016	15/12/2016	06/02/2017	31/03/2017	04/04/2017	06/04/2017	04/04/2017	A4, AR0, NA0	WC_2500_8000
https://wellcomeopenresearch.org/articles/1-30/v2	1	30	RESEARCH_NOTE	2	29/05/2017			31/05/2017	01/06/2017	14/06/2017	06/02/2017	31/03/2017	04/04/2017	06/04/2017	04/04/2017	A4, AR0, NA0	WC_2500_8000
https://wellcomeopenresearch.org/articles/1-31/v1	1	31	STUDY_PROTOCOL	1	30/11/2016	01/12/2016		05/12/2016	12/12/2016	16/12/2016	01/02/2017	06/03/2017	29/03/2017		06/03/2017	A3, AR0, NA0	WC_1000_2500
https://wellcomeopenresearch.org/articles/1-32/v1	1	32	RESEARCH_ARTICLE	1	28/11/2016	29/11/2016		09/12/2016	20/12/2016	23/12/2016	15/02/2017	13/03/2017				A0, AR2, NA0	WC_2500_8000
https://wellcomeopenresearch.org/articles/1-33/v1	1	33	RESEARCH_ARTICLE	1	23/11/2016	25/11/2016	16/12/2016	22/12/2016	28/12/2016	29/12/2016	15/03/2017	09/05/2017				A0, AR0, NA2	WC_2500_8000
https://wellcomeopenresearch.org/articles/2-1/v1	2	1	RESEARCH_ARTICLE	1	21/11/2016	23/11/2016		23/12/2016	28/12/2016	04/01/2017	20/01/2017	23/01/2017	14/02/2017		14/02/2017	A2, AR1, NA0	WC_1000_2500
https://wellcomeopenresearch.org/articles/2-2/v1	2	2	RESEARCH_ARTICLE	1	15/12/2016	16/12/2016		22/12/2016	23/12/2016	05/01/2017	16/01/2017	16/01/2017	19/01/2017	24/01/2017	19/01/2017	A4, AR0, NA0	WC_2500_8000
https://wellcomeopenresearch.org/articles/2-2/v2	2	2	RESEARCH_ARTICLE	2	11/02/2017			16/02/2017	17/02/2017	21/02/2017	16/01/2017	16/01/2017	19/01/2017	24/01/2017	19/01/2017	A4, AR0, NA0	WC_2500_8000
https://wellcomeopenresearch.org/articles/2-3/v1	2	3	RESEARCH_ARTICLE	1	05/12/2016	23/12/2016		04/01/2017	05/01/2017	09/01/2017	16/01/2017	23/01/2017			27/06/2017	A2, AR0, NA0	WC_OVER_8000
https://wellcomeopenresearch.org/articles/2-3/v2	2	3	RESEARCH_ARTICLE	2	15/05/2017			17/05/2017	22/05/2017	23/05/2017	16/01/2017	23/01/2017			27/06/2017	A2, AR0, NA0	WC_OVER_8000
https://wellcomeopenresearch.org/articles/2-4/v1	2	4	RESEARCH_ARTICLE	1	21/12/2016	28/12/2016		05/01/2017	10/01/2017	13/01/2017	03/02/2017	06/02/2017	09/02/2017	13/02/2017		A0, AR4, NA0	WC_2500_8000
https://wellcomeopenresearch.org/articles/2-5/v1	2	5	RESEARCH_ARTICLE	1	27/12/2016	30/12/2016		05/01/2017	09/01/2017	17/01/2017	30/01/2017	13/02/2017	20/02/2017		20/02/2017	A2, AR1, NA0	WC_2500_8000
https://wellcomeopenresearch.org/articles/2-6/v1	2	6	SOFTWARE_TOOLS	1	14/12/2016	16/12/2016		04/01/2017	05/01/2017	17/01/2017	31/01/2017	09/02/2017	17/02/2017		17/02/2017	A3, AR0, NA0	WC_1000_2500
https://wellcomeopenresearch.org/articles/2-6/v2	2	6	SOFTWARE_TOOLS	2	13/03/2017			14/03/2017		17/03/2017	31/01/2017	09/02/2017	17/02/2017		17/02/2017	A3, AR0, NA0	WC_1000_2500
https://wellcomeopenresearch.org/articles/2-7/v1	2	7	RESEARCH_ARTICLE	1	18/01/2017	20/01/2017		31/01/2017	31/01/2017	02/02/2017	22/02/2017	23/02/2017	28/02/2017		23/02/2017	A2, AR1, NA0	WC_2500_8000
https://wellcomeopenresearch.org/articles/2-8/v1	2	8	RESEARCH_NOTE	1	10/01/2017	12/01/2017		19/01/2017	20/01/2017	09/02/2017	20/02/2017	27/02/2017			27/02/2017	A2, AR0, NA0
https://wellcomeopenresearch.org/articles/2-9/v1	2	9	RESEARCH_ARTICLE	1	09/01/2017	12/01/2017		02/02/2017	03/02/2017	10/02/2017	27/02/2017	02/05/2017			02/05/2017	A2, AR0, NA0
https://wellcomeopenresearch.org/articles/2-10/v1	2	10	RESEARCH_ARTICLE	1	26/01/2017	30/01/2017		10/02/2017	13/02/2017	14/02/2017	29/03/2017	11/04/2017	18/04/2017	19/06/2017	11/04/2017	A4, AR0, NA0	WC_2500_8000
https://wellcomeopenresearch.org/articles/2-10/v2	2	10	RESEARCH_ARTICLE	2	30/08/2017			31/08/2017	04/09/2017	08/09/2017	29/03/2017	11/04/2017	18/04/2017	19/06/2017	11/04/2017	A4, AR0, NA0	WC_2500_8000
https://wellcomeopenresearch.org/articles/2-11/v1	2	11	RESEARCH_ARTICLE	1	23/12/2016	24/01/2017	31/01/2017	01/02/2017	02/02/2017	14/02/2017	13/03/2017	20/03/2017	21/03/2017	22/03/2017	20/03/2017	A4, AR0, NA0	WC_2500_8000
https://wellcomeopenresearch.org/articles/2-12/v1	2	12	RESEARCH_ARTICLE	1	24/01/2017	26/01/2017	31/01/2017	03/02/2017	08/02/2017	15/02/2017	27/02/2017	03/03/2017	04/04/2017	18/04/2017	18/04/2017	A1, AR3, NA0	WC_2500_8000
https://wellcomeopenresearch.org/articles/2-13/v1	2	13	SYSTEMATIC_REVIEW	1	21/01/2017	25/01/2017	13/02/2017	16/02/2017	17/02/2017	20/02/2017	29/03/2017	11/05/2017			05/06/2017	A2, AR0, NA0	WC_2500_8000
https://wellcomeopenresearch.org/articles/2-13/v2	2	13	SYSTEMATIC_REVIEW	2	29/05/2017			31/05/2017	01/06/2017	02/06/2017	29/03/2017	11/05/2017			05/06/2017	A2, AR0, NA0	WC_2500_8000
https://wellcomeopenresearch.org/articles/2-14/v1	2	14	RESEARCH_ARTICLE	1	23/12/2016	30/12/2016		08/02/2017	10/02/2017	24/02/2017	10/03/2017	10/04/2017				A0, AR0, NA2	WC_2500_8000
https://wellcomeopenresearch.org/articles/2-14/v2	2	14	RESEARCH_ARTICLE	2	11/09/2017			04/10/2017	09/10/2017	11/10/2017	10/03/2017	10/04/2017				A0, AR0, NA2	WC_2500_8000
https://wellcomeopenresearch.org/articles/2-15/v1	2	15	OPEN_LETTER	1	11/02/2017	13/02/2017	17/02/2017	21/02/2017	22/02/2017	24/02/2017	06/03/2017	09/03/2017			09/03/2017	A2, AR0, NA0	WC_1000_2500
https://wellcomeopenresearch.org/articles/2-16/v1	2	16	RESEARCH_ARTICLE	1	23/02/2017	27/02/2017		06/03/2017	09/03/2017	10/03/2017	27/04/2017	20/06/2017				A1, AR1, NA0	WC_2500_8000
https://wellcomeopenresearch.org/articles/2-16/v2	2	16	RESEARCH_ARTICLE	2	12/11/2017			13/11/2017	15/11/2017		27/04/2017	20/06/2017				A1, AR1, NA0	WC_2500_8000
https://wellcomeopenresearch.org/articles/2-17/v1	2	17	RESEARCH_ARTICLE	1	24/10/2016	27/10/2016		24/01/2017	25/01/2017	13/03/2017	14/03/2017	20/03/2017	21/03/2017	27/03/2017	20/03/2017	A4, AR0, NA0
https://wellcomeopenresearch.org/articles/2-17/v2	2	17	RESEARCH_ARTICLE	2	06/04/2017				06/04/2017	10/04/2017	14/03/2017	20/03/2017	21/03/2017	27/03/2017	20/03/2017	A4, AR0, NA0
https://wellcomeopenresearch.org/articles/2-18/v1	2	18	METHOD_ARTICLE	1	17/02/2017	21/02/2017	28/02/2017		03/03/2017	14/03/2017	27/03/2017	29/03/2017	30/03/2017	05/04/2017	29/03/2017	A5, AR0, NA0	WC_2500_8000
https://wellcomeopenresearch.org/articles/2-19/v1	2	19	METHOD_ARTICLE	1	03/03/2017	06/03/2017	07/03/2017	09/03/2017	14/03/2017	15/03/2017	06/04/2017	09/05/2017			09/05/2017	A2, AR0, NA0	WC_2500_8000
https://wellcomeopenresearch.org/articles/2-20/v1	2	20	RESEARCH_ARTICLE	1	15/02/2017	20/02/2017	14/03/2017	14/03/2017	16/03/2017	17/03/2017	05/04/2017	06/04/2017	19/04/2017		19/04/2017	A3, AR0, NA0	WC_2500_8000
https://wellcomeopenresearch.org/articles/2-20/v2	2	20	RESEARCH_ARTICLE	2	21/04/2017			25/04/2017	26/04/2017	26/04/2017	05/04/2017	06/04/2017	19/04/2017		19/04/2017	A3, AR0, NA0	WC_2500_8000
https://wellcomeopenresearch.org/articles/2-21/v1	2	21	RESEARCH_ARTICLE	1	15/03/2017	17/03/2017		20/03/2017	22/03/2017	28/03/2017	27/04/2017	30/05/2017				A0, AR2, NA0	WC_2500_8000
https://wellcomeopenresearch.org/articles/2-21/v2	2	21	RESEARCH_ARTICLE	2	03/10/2017			26/10/2017	30/10/2017	31/10/2017	27/04/2017	30/05/2017				A0, AR2, NA0	WC_2500_8000
https://wellcomeopenresearch.org/articles/2-22/v1	2	22	RESEARCH_ARTICLE	1	22/03/2017	23/03/2017	27/03/2017	28/03/2017	29/03/2017	30/03/2017	25/04/2017	02/05/2017	18/05/2017	02/06/2017		A0, AR4, NA0	WC_2500_8000
https://wellcomeopenresearch.org/articles/2-23/v1	2	23	RESEARCH_ARTICLE	1	26/03/2017	28/03/2017	04/04/2017	04/04/2017	05/04/2017	06/04/2017	21/04/2017	09/05/2017			09/05/2017	A2, AR0, NA0	WC_1000_2500
https://wellcomeopenresearch.org/articles/2-23/v2	2	23	RESEARCH_ARTICLE	2	16/05/2017			17/05/2017	18/05/2017	18/05/2017	21/04/2017	09/05/2017			09/05/2017	A2, AR0, NA0	WC_1000_2500
https://wellcomeopenresearch.org/articles/2-24/v1	2	24	SOFTWARE_TOOLS	1	24/03/2017	27/03/2017	29/03/2017	30/03/2017	31/03/2017	07/04/2017	02/05/2017	10/05/2017			10/05/2017	A2, AR0, NA0	WC_1000_2500
https://wellcomeopenresearch.org/articles/2-25/v1	2	25	RESEARCH_ARTICLE	1	22/03/2017	24/03/2017		31/03/2017	04/04/2017	07/04/2017	19/04/2017	20/04/2017	24/04/2017	02/05/2017	20/04/2017	A4, AR0, NA0	WC_2500_8000
https://wellcomeopenresearch.org/articles/2-25/v2	2	25	RESEARCH_ARTICLE	2	17/10/2017			17/10/2017	20/10/2017	23/10/2017	19/04/2017	20/04/2017	24/04/2017	02/05/2017	20/04/2017	A4, AR0, NA0	WC_2500_8000
https://wellcomeopenresearch.org/articles/2-26/v1	2	26	RESEARCH_ARTICLE	1	14/03/2017	16/03/2017	27/03/2017	28/03/2017	31/03/2017	07/04/2017	24/04/2017	08/05/2017	19/06/2017		08/05/2017	A3, AR0, NA0	WC_2500_8000
https://wellcomeopenresearch.org/articles/2-27/v1	2	27	RESEARCH_ARTICLE	1	31/03/2017	04/04/2017		06/04/2017	07/04/2017	13/04/2017	03/05/2017	11/05/2017	16/05/2017		11/05/2017	A3, AR0, NA0	WC_2500_8000
https://wellcomeopenresearch.org/articles/2-28/v1	2	28	RESEARCH_ARTICLE	1	28/03/2017	30/03/2017		11/04/2017	12/04/2017	18/04/2017	06/06/2017	13/06/2017			26/07/2017	A2, AR0, NA0	WC_2500_8000
https://wellcomeopenresearch.org/articles/2-28/v2	2	28	RESEARCH_ARTICLE	2	11/07/2017			12/07/2017		18/07/2017	06/06/2017	13/06/2017			26/07/2017	A2, AR0, NA0	WC_2500_8000
https://wellcomeopenresearch.org/articles/2-28/v3	2	28	RESEARCH_ARTICLE	3	04/10/2017			04/10/2017		05/10/2017	06/06/2017	13/06/2017			26/07/2017	A2, AR0, NA0	WC_2500_8000
https://wellcomeopenresearch.org/articles/2-29/v1	2	29	RESEARCH_ARTICLE	1	20/03/2017	22/03/2017	28/03/2017	31/03/2017	03/04/2017	20/04/2017	19/06/2017	06/07/2017			06/07/2017	A2, AR0, NA0	WC_2500_8000
https://wellcomeopenresearch.org/articles/2-29/v2	2	29	RESEARCH_ARTICLE	2	29/08/2017			31/08/2017	01/09/2017	05/09/2017	19/06/2017	06/07/2017			06/07/2017	A2, AR0, NA0	WC_2500_8000
https://wellcomeopenresearch.org/articles/2-30/v1	2	30	RESEARCH_ARTICLE	1	11/04/2017	19/04/2017		21/04/2017	24/04/2017	26/04/2017	05/05/2017	09/05/2017	08/06/2017		09/05/2017	A3, AR0, NA0	WC_OVER_8000
https://wellcomeopenresearch.org/articles/2-31/v1	2	31	SOFTWARE_TOOLS	1	10/05/2017	11/05/2017	12/05/2017	15/05/2017	16/05/2017	17/05/2017	30/05/2017	12/06/2017			29/06/2017	A2, AR0, NA0	WC_UPTO_1000
https://wellcomeopenresearch.org/articles/2-31/v2	2	31	SOFTWARE_TOOLS	2	16/06/2017			16/06/2017	19/06/2017	21/06/2017	30/05/2017	12/06/2017			29/06/2017	A2, AR0, NA0	WC_UPTO_1000
https://wellcomeopenresearch.org/articles/2-32/v1	2	32	RESEARCH_ARTICLE	1	08/05/2017	10/05/2017	16/05/2017	16/05/2017	17/05/2017	19/05/2017	09/06/2017	12/06/2017	12/06/2017		12/06/2017	A3, AR0, NA0	WC_2500_8000
https://wellcomeopenresearch.org/articles/2-32/v2	2	32	RESEARCH_ARTICLE	2	10/07/2017			12/07/2017	13/07/2017	24/07/2017	09/06/2017	12/06/2017	12/06/2017		12/06/2017	A3, AR0, NA0	WC_2500_8000
https://wellcomeopenresearch.org/articles/2-33/v1	2	33	SOFTWARE_TOOLS	1	12/05/2017	15/05/2017		19/05/2017	22/05/2017	23/05/2017	05/06/2017	12/06/2017			12/06/2017	A2, AR0, NA0	WC_UPTO_1000
https://wellcomeopenresearch.org/articles/2-34/v1	2	34	RESEARCH_ARTICLE	1	16/05/2017	17/05/2017		22/05/2017	23/05/2017	25/05/2017	08/06/2017	19/06/2017	20/06/2017		19/06/2017	A3, AR0, NA0	WC_2500_8000
https://wellcomeopenresearch.org/articles/2-34/v2	2	34	RESEARCH_ARTICLE	2	20/06/2017			22/06/2017	23/06/2017	03/07/2017	08/06/2017	19/06/2017	20/06/2017		19/06/2017	A3, AR0, NA0	WC_2500_8000
https://wellcomeopenresearch.org/articles/2-35/v1	2	35	DATA_NOTE	1	18/05/2017	18/05/2017			25/05/2017	26/05/2017	06/06/2017	13/06/2017			13/06/2017	A2, AR0, NA0	WC_UPTO_1000
https://wellcomeopenresearch.org/articles/2-36/v1	2	36	RESEARCH_ARTICLE	1	25/05/2017	26/05/2017	30/05/2017	02/06/2017	05/06/2017	05/06/2017	06/06/2017	26/06/2017			17/10/2017	A2, AR0, NA0	WC_2500_8000
https://wellcomeopenresearch.org/articles/2-36/v2	2	36	RESEARCH_ARTICLE	2	28/09/2017			06/10/2017	09/10/2017	09/10/2017	06/06/2017	26/06/2017			17/10/2017	A2, AR0, NA0	WC_2500_8000
https://wellcomeopenresearch.org/articles/2-37/v1	2	37	STUDY_PROTOCOL	1	27/04/2017	02/05/2017		17/05/2017	18/05/2017	06/06/2017	26/06/2017	27/06/2017				A1, AR1, NA0	WC_2500_8000
https://wellcomeopenresearch.org/articles/2-37/v2	2	37	STUDY_PROTOCOL	2	07/11/2017			08/11/2017	09/11/2017	16/11/2017	26/06/2017	27/06/2017				A1, AR1, NA0	WC_2500_8000
https://wellcomeopenresearch.org/articles/2-38/v1	2	38	RESEARCH_ARTICLE	1	23/05/2017	25/05/2017		30/05/2017	31/05/2017	06/06/2017	19/06/2017	30/06/2017				A1, AR1, NA0	WC_2500_8000
https://wellcomeopenresearch.org/articles/2-39/v1	2	39	RESEARCH_NOTE	1	23/05/2017	24/05/2017		30/05/2017	31/05/2017	07/06/2017	08/06/2017	20/06/2017			28/07/2017	A2, AR0, NA0	WC_1000_2500
https://wellcomeopenresearch.org/articles/2-39/v2	2	39	RESEARCH_NOTE	2	03/07/2017			03/07/2017	04/07/2017	05/07/2017	08/06/2017	20/06/2017			28/07/2017	A2, AR0, NA0	WC_1000_2500
https://wellcomeopenresearch.org/articles/2-40/v1	2	40	METHOD_ARTICLE	1	31/05/2017	02/06/2017		05/06/2017	06/06/2017	08/06/2017	16/06/2017	20/06/2017	20/06/2017		20/06/2017	A2, AR1, NA0	WC_2500_8000
https://wellcomeopenresearch.org/articles/2-41/v1	2	41	RESEARCH_ARTICLE	1	03/05/2017	05/05/2017		05/06/2017	06/06/2017	15/06/2017	25/07/2017	31/07/2017	07/08/2017		07/08/2017	A2, AR1, NA0	WC_1000_2500
https://wellcomeopenresearch.org/articles/2-42/v1	2	42	RESEARCH_ARTICLE	1	07/06/2017	09/06/2017		13/06/2017	15/06/2017	16/06/2017	29/06/2017	30/06/2017			30/06/2017	A2, AR0, NA0	WC_2500_8000
https://wellcomeopenresearch.org/articles/2-43/v1	2	43	METHOD_ARTICLE	1	23/05/2017	24/05/2017		30/05/2017	01/06/2017	19/06/2017	24/07/2017	24/10/2017	16/11/2017	17/11/2017		A0, AR4, NA0	WC_2500_8000
https://wellcomeopenresearch.org/articles/2-44/v1	2	44	RESEARCH_ARTICLE	1	25/05/2017	30/05/2017	06/06/2017	09/06/2017	12/06/2017	20/06/2017	12/07/2017	17/07/2017	07/09/2017			A0, AR3, NA0	WC_2500_8000
https://wellcomeopenresearch.org/articles/2-45/v1	2	45	DATA_NOTE	1	16/06/2017	19/06/2017		19/06/2017	20/06/2017	21/06/2017	29/06/2017	03/07/2017			03/07/2017	A2, AR0, NA0	WC_1000_2500
https://wellcomeopenresearch.org/articles/2-45/v2	2	45	DATA_NOTE	2	21/07/2017			21/07/2017	24/07/2017	24/07/2017	29/06/2017	03/07/2017			03/07/2017	A2, AR0, NA0	WC_1000_2500
https://wellcomeopenresearch.org/articles/2-46/v1	2	46	RESEARCH_NOTE	1	21/04/2017	24/04/2017		31/05/2017	01/06/2017	22/06/2017	03/07/2017	06/07/2017	17/07/2017		06/07/2017	A3, AR0, NA0	WC_1000_2500
https://wellcomeopenresearch.org/articles/2-47/v1	2	47	RESEARCH_ARTICLE	1	20/06/2017	21/06/2017	23/06/2017	28/06/2017	29/06/2017	03/07/2017	07/07/2017	14/08/2017			10/11/2017	A2, AR0, NA0	WC_1000_2500
https://wellcomeopenresearch.org/articles/2-47/v2	2	47	RESEARCH_ARTICLE	2	21/09/2017			22/09/2017	25/09/2017	26/09/2017	07/07/2017	14/08/2017			10/11/2017	A2, AR0, NA0	WC_1000_2500
https://wellcomeopenresearch.org/articles/2-48/v1	2	48	RESEARCH_ARTICLE	1	14/06/2017	15/06/2017		29/06/2017	30/06/2017	04/07/2017	08/08/2017	11/09/2017			09/11/2017	A2, AR0, NA0	WC_2500_8000
https://wellcomeopenresearch.org/articles/2-48/v2	2	48	RESEARCH_ARTICLE	2	29/10/2017			01/11/2017	06/11/2017	07/11/2017	08/08/2017	11/09/2017			09/11/2017	A2, AR0, NA0	WC_2500_8000
https://wellcomeopenresearch.org/articles/2-49/v1	2	49	METHOD_ARTICLE	1	06/06/2017	07/06/2017	27/06/2017	29/06/2017	30/06/2017	14/07/2017	28/07/2017	31/07/2017				A1, AR1, NA0	WC_1000_2500
https://wellcomeopenresearch.org/articles/2-50/v1	2	50	RESEARCH_ARTICLE	1	21/06/2017	22/06/2017		13/07/2017	14/07/2017	17/07/2017	28/07/2017	17/08/2017	01/09/2017		01/09/2017	A1, AR2, NA0	WC_2500_8000
https://wellcomeopenresearch.org/articles/2-50/v2	2	50	RESEARCH_ARTICLE	2	08/11/2017			14/11/2017	16/11/2017		28/07/2017	17/08/2017	01/09/2017		01/09/2017	A1, AR2, NA0	WC_2500_8000
https://wellcomeopenresearch.org/articles/2-51/v1	2	51	RESEARCH_ARTICLE	1	28/03/2017	30/03/2017	31/05/2017	13/07/2017	14/07/2017	17/07/2017	12/09/2017	13/10/2017				A1, AR1, NA0	WC_2500_8000
https://wellcomeopenresearch.org/articles/2-52/v1	2	52	RESEARCH_ARTICLE	1	05/07/2017	10/07/2017		19/07/2017	20/07/2017	21/07/2017	04/08/2017	31/08/2017				A1, AR1, NA0	WC_2500_8000
https://wellcomeopenresearch.org/articles/2-53/v1	2	53	RESEARCH_ARTICLE	1	29/06/2017	04/07/2017		13/07/2017	14/07/2017	21/07/2017	25/09/2017	18/10/2017				A1, AR1, NA0	WC_2500_8000
https://wellcomeopenresearch.org/articles/2-53/v2	2	53	RESEARCH_ARTICLE	2	06/11/2017			06/11/2017	07/11/2017	09/11/2017	25/09/2017	18/10/2017				A1, AR1, NA0	WC_2500_8000
https://wellcomeopenresearch.org/articles/2-54/v1	2	54	RESEARCH_ARTICLE	1	13/06/2017	14/06/2017	20/06/2017	14/07/2017	17/07/2017	21/07/2017	04/08/2017	07/08/2017			07/08/2017	A2, AR0, NA0	WC_2500_8000
https://wellcomeopenresearch.org/articles/2-55/v1	2	55	RESEARCH_ARTICLE	1	10/07/2017	13/07/2017		19/07/2017	21/07/2017	24/07/2017	25/07/2017	28/09/2017	02/10/2017		27/10/2017	A2, AR1, NA0	WC_2500_8000
https://wellcomeopenresearch.org/articles/2-55/v2	2	55	RESEARCH_ARTICLE	2	13/10/2017			17/10/2017	23/10/2017	24/10/2017	25/07/2017	28/09/2017	02/10/2017		27/10/2017	A2, AR1, NA0	WC_2500_8000
https://wellcomeopenresearch.org/articles/2-56/v1	2	56	SOFTWARE_TOOLS	1	19/07/2017	20/07/2017	20/07/2017	21/07/2017	25/07/2017	26/07/2017	07/08/2017	22/08/2017			22/08/2017	A2, AR0, NA0	WC_2500_8000
https://wellcomeopenresearch.org/articles/2-57/v1	2	57	RESEARCH_ARTICLE	1	17/07/2017	17/07/2017	20/07/2017	24/07/2017	24/07/2017	26/07/2017	07/08/2017	11/08/2017	30/08/2017		11/08/2017	A3, AR0, NA0	WC_2500_8000
https://wellcomeopenresearch.org/articles/2-58/v1	2	58	STUDY_PROTOCOL	1	21/06/2017	22/06/2017	14/07/2017	20/07/2017	24/07/2017	28/07/2017	19/09/2017	25/10/2017			25/10/2017	A2, AR0, NA0	WC_2500_8000
https://wellcomeopenresearch.org/articles/2-59/v1	2	59	RESEARCH_ARTICLE	1	30/06/2017	07/07/2017		26/07/2017	27/07/2017	28/07/2017	10/08/2017	29/08/2017			29/08/2017	A2, AR0, NA0	WC_2500_8000
https://wellcomeopenresearch.org/articles/2-60/v1	2	60	RESEARCH_ARTICLE	1	17/07/2017	19/07/2017		01/08/2017	02/08/2017	03/08/2017	29/08/2017	09/10/2017			27/10/2017	A2, AR0, NA0	WC_2500_8000
https://wellcomeopenresearch.org/articles/2-60/v2	2	60	RESEARCH_ARTICLE	2	13/10/2017			16/10/2017	17/10/2017	17/10/2017	29/08/2017	09/10/2017			27/10/2017	A2, AR0, NA0	WC_2500_8000
https://wellcomeopenresearch.org/articles/2-61/v1	2	61	RESEARCH_ARTICLE	1	13/07/2017	18/07/2017		04/08/2017	07/08/2017	10/08/2017	08/09/2017	15/09/2017			15/09/2017	A2, AR0, NA0	WC_2500_8000
https://wellcomeopenresearch.org/articles/2-62/v1	2	62	STUDY_PROTOCOL	1	31/07/2017	02/08/2017		07/08/2017	08/08/2017	10/08/2017	14/08/2017	23/08/2017			23/08/2017	A2, AR0, NA0	WC_2500_8000
https://wellcomeopenresearch.org/articles/2-63/v1	2	63	RESEARCH_ARTICLE	1	27/07/2017	31/07/2017		07/08/2017	10/08/2017	16/08/2017	06/09/2017	03/10/2017			03/10/2017	A2, AR0, NA0	WC_OVER_8000
https://wellcomeopenresearch.org/articles/2-64/v1	2	64	RESEARCH_ARTICLE	1	27/06/2017	19/07/2017	14/08/2017	15/08/2017	17/08/2017	17/08/2017	04/09/2017	05/10/2017			05/10/2017	A2, AR0, NA0	WC_1000_2500
https://wellcomeopenresearch.org/articles/2-64/v2	2	64	RESEARCH_ARTICLE	2	29/10/2017			30/10/2017	01/11/2017	01/11/2017	04/09/2017	05/10/2017			05/10/2017	A2, AR0, NA0	WC_1000_2500
https://wellcomeopenresearch.org/articles/2-65/v1	2	65	SYSTEMATIC_REVIEW	1	05/08/2017	09/08/2017	11/08/2017	15/08/2017	16/08/2017	18/08/2017	24/08/2017	07/09/2017	03/10/2017		07/09/2017	A3, AR0, NA0	WC_2500_8000
https://wellcomeopenresearch.org/articles/2-66/v1	2	66	SYSTEMATIC_REVIEW	1	05/08/2017	09/08/2017	11/08/2017	15/08/2017	17/08/2017	18/08/2017	21/08/2017	04/09/2017			20/10/2017	A2, AR0, NA0	WC_2500_8000
https://wellcomeopenresearch.org/articles/2-66/v2	2	66	SYSTEMATIC_REVIEW	2	26/09/2017			26/09/2017	28/09/2017	28/09/2017	21/08/2017	04/09/2017			20/10/2017	A2, AR0, NA0	WC_2500_8000
https://wellcomeopenresearch.org/articles/2-66/v3	2	66	SYSTEMATIC_REVIEW	3	23/10/2017			23/10/2017	26/10/2017	27/10/2017	21/08/2017	04/09/2017			20/10/2017	A2, AR0, NA0	WC_2500_8000
https://wellcomeopenresearch.org/articles/2-67/v1	2	67	RESEARCH_ARTICLE	1	19/07/2017	21/07/2017		17/08/2017	21/08/2017	22/08/2017	04/09/2017					A1, AR0, NA0	WC_2500_8000
https://wellcomeopenresearch.org/articles/2-68/v1	2	68	RESEARCH_ARTICLE	1	09/08/2017	14/08/2017	15/08/2017	17/08/2017	21/08/2017	22/08/2017	01/09/2017	15/09/2017	18/09/2017		18/09/2017	A2, AR1, NA0	WC_2500_8000
https://wellcomeopenresearch.org/articles/2-69/v1	2	69	RESEARCH_ARTICLE	1	09/06/2017	12/06/2017	24/07/2017	01/08/2017	03/08/2017	22/08/2017	09/10/2017	13/11/2017			13/11/2017	A2, AR0, NA0	WC_2500_8000
https://wellcomeopenresearch.org/articles/2-70/v1	2	70	OPEN_LETTER	1	08/08/2017	11/08/2017	16/08/2017	17/08/2017	21/08/2017	24/08/2017	29/08/2017	02/10/2017			02/10/2017	A2, AR0, NA0	WC_2500_8000
https://wellcomeopenresearch.org/articles/2-71/v1	2	71	RESEARCH_ARTICLE	1	25/07/2017	26/07/2017	11/08/2017	17/08/2017	22/08/2017	24/08/2017	18/09/2017	29/09/2017			29/09/2017	A2, AR0, NA0	WC_1000_2500
https://wellcomeopenresearch.org/articles/2-72/v1	2	72	RESEARCH_ARTICLE	1	07/08/2017	10/08/2017	14/08/2017	22/08/2017	23/08/2017	24/08/2017	04/09/2017	25/09/2017			13/11/2017	A2, AR0, NA0	WC_2500_8000
https://wellcomeopenresearch.org/articles/2-72/v2	2	72	RESEARCH_ARTICLE	2	23/10/2017			24/10/2017	30/10/2017	02/11/2017	04/09/2017	25/09/2017			13/11/2017	A2, AR0, NA0	WC_2500_8000
https://wellcomeopenresearch.org/articles/2-73/v1	2	73	RESEARCH_NOTE	1	16/08/2017	22/08/2017		25/08/2017	29/08/2017	30/08/2017	04/09/2017	23/10/2017				A1, AR1, NA0	WC_1000_2500
https://wellcomeopenresearch.org/articles/2-73/v2	2	73	RESEARCH_NOTE	2	17/11/2017			20/11/2017			04/09/2017	23/10/2017				A1, AR1, NA0	WC_1000_2500
https://wellcomeopenresearch.org/articles/2-74/v1	2	74	DATA_NOTE	1	16/08/2017	18/08/2017	23/08/2017	24/08/2017	29/08/2017	30/08/2017	11/09/2017	18/09/2017			18/09/2017	A2, AR0, NA0	WC_UPTO_1000
https://wellcomeopenresearch.org/articles/2-75/v1	2	75	CASE_REPORT	1	04/06/2017	07/06/2017	11/07/2017	22/08/2017	23/08/2017	31/08/2017	26/09/2017	19/10/2017			19/10/2017	A2, AR0, NA0	WC_2500_8000
https://wellcomeopenresearch.org/articles/2-76/v1	2	76	RESEARCH_NOTE	1	15/08/2017	17/08/2017		22/08/2017	23/08/2017	31/08/2017	19/09/2017	02/10/2017	12/10/2017		12/10/2017	A2, AR0, NA1	WC_1000_2500
https://wellcomeopenresearch.org/articles/2-77/v1	2	77	RESEARCH_ARTICLE	1	25/08/2017	29/08/2017		30/08/2017	31/08/2017	04/09/2017	16/10/2017	20/10/2017				A0, AR2, NA0	WC_2500_8000
https://wellcomeopenresearch.org/articles/2-78/v1	2	78	RESEARCH_ARTICLE	1	20/08/2017	23/08/2017		30/08/2017	31/08/2017	04/09/2017	13/09/2017	15/09/2017	01/11/2017	06/11/2017	01/11/2017	A3, AR1, NA0	WC_2500_8000
https://wellcomeopenresearch.org/articles/2-79/v1	2	79	RESEARCH_ARTICLE	1	30/07/2017	02/08/2017		30/08/2017	31/08/2017	04/09/2017	21/09/2017					A0, AR1, NA0	WC_2500_8000
https://wellcomeopenresearch.org/articles/2-80/v1	2	80	RESEARCH_ARTICLE	1	15/08/2017	17/08/2017	22/08/2017	29/08/2017	30/08/2017	05/09/2017						A0, AR0, NA0
https://wellcomeopenresearch.org/articles/2-81/v1	2	81	RESEARCH_ARTICLE	1	02/08/2017	04/08/2017	15/08/2017	17/08/2017	21/08/2017	06/09/2017	27/09/2017	09/10/2017			09/10/2017	A2, AR0, NA0	WC_2500_8000
https://wellcomeopenresearch.org/articles/2-82/v1	2	82	RESEARCH_ARTICLE	1	10/07/2017	14/07/2017	11/08/2017	14/08/2017	16/08/2017	07/09/2017	21/09/2017	26/09/2017	20/10/2017		20/10/2017	A1, AR2, NA0	WC_2500_8000
https://wellcomeopenresearch.org/articles/2-83/v1	2	83	RESEARCH_ARTICLE	1	20/08/2017	21/08/2017	25/08/2017	11/09/2017	11/09/2017	12/09/2017	20/09/2017	25/09/2017				A1, AR1, NA0	WC_2500_8000
https://wellcomeopenresearch.org/articles/2-83/v2	2	83	RESEARCH_ARTICLE	2	11/10/2017			11/10/2017	12/10/2017	13/10/2017	20/09/2017	25/09/2017				A1, AR1, NA0	WC_2500_8000
https://wellcomeopenresearch.org/articles/2-84/v1	2	84	RESEARCH_ARTICLE	1	27/07/2017	31/07/2017	04/09/2017	11/09/2017	12/09/2017	13/09/2017	19/09/2017	25/09/2017	16/10/2017		16/10/2017	A1, AR2, NA0	WC_1000_2500
https://wellcomeopenresearch.org/articles/2-85/v1	2	85	DATA_NOTE	1	04/09/2017	07/09/2017		14/09/2017	15/09/2017	18/09/2017	02/10/2017	11/10/2017	16/10/2017		16/10/2017	A2, AR1, NA0	WC_1000_2500
https://wellcomeopenresearch.org/articles/2-86/v1	2	86	RESEARCH_ARTICLE	1	28/07/2017	01/08/2017	22/08/2017	24/08/2017	29/08/2017	19/09/2017	06/10/2017	09/10/2017			09/10/2017	A2, AR0, NA0	WC_2500_8000
https://wellcomeopenresearch.org/articles/2-87/v1	2	87	RESEARCH_ARTICLE	1	26/08/2017	29/08/2017		18/09/2017	19/09/2017	22/09/2017	12/10/2017	16/10/2017	01/11/2017		16/10/2017	A2, AR1, NA0	WC_2500_8000
https://wellcomeopenresearch.org/articles/2-88/v1	2	88	RESEARCH_ARTICLE	1	30/08/2017	31/08/2017		13/09/2017	15/09/2017	22/09/2017	28/09/2017	20/10/2017	15/11/2017		15/11/2017	A1, AR2, NA0
https://wellcomeopenresearch.org/articles/2-89/v1	2	89	STUDY_PROTOCOL	1	20/08/2017	24/08/2017		12/09/2017	14/09/2017	25/09/2017	16/10/2017					A0, AR1, NA0	WC_2500_8000
https://wellcomeopenresearch.org/articles/2-90/v1	2	90	RESEARCH_ARTICLE	1	30/08/2017	01/09/2017		19/09/2017	21/09/2017	26/09/2017	06/10/2017	11/10/2017	02/11/2017		02/11/2017	A2, AR0, NA1	WC_2500_8000
https://wellcomeopenresearch.org/articles/2-91/v1	2	91	RESEARCH_ARTICLE	1	07/09/2017	11/09/2017	18/09/2017	18/09/2017	19/09/2017	26/09/2017	16/10/2017	18/10/2017	10/11/2017		10/11/2017	A2, AR1, NA0	WC_2500_8000
https://wellcomeopenresearch.org/articles/2-92/v1	2	92	RESEARCH_ARTICLE	1	07/09/2017	11/09/2017	15/09/2017	18/09/2017	20/09/2017	26/09/2017	11/10/2017	16/10/2017	16/10/2017		16/10/2017	A3, AR0, NA0	WC_2500_8000
https://wellcomeopenresearch.org/articles/2-93/v1	2	93	RESEARCH_ARTICLE	1	28/07/2017	03/08/2017		18/09/2017	21/09/2017	27/09/2017	16/10/2017	26/10/2017				A1, AR1, NA0	WC_OVER_8000
https://wellcomeopenresearch.org/articles/2-94/v1	2	94	RESEARCH_ARTICLE	1	08/09/2017	12/09/2017		18/09/2017	21/09/2017	28/09/2017	08/11/2017					A1, AR0, NA0	WC_2500_8000
https://wellcomeopenresearch.org/articles/2-95/v1	2	95	RESEARCH_ARTICLE	1	02/09/2017	06/09/2017	20/09/2017	25/09/2017	26/09/2017	29/09/2017	05/10/2017	06/10/2017	13/10/2017		13/10/2017	A1, AR2, NA0	WC_2500_8000
https://wellcomeopenresearch.org/articles/2-96/v1	2	96	RESEARCH_ARTICLE	1	07/09/2017	11/09/2017	15/09/2017	26/09/2017	28/09/2017	02/10/2017	05/10/2017					A1, AR0, NA0	WC_2500_8000
https://wellcomeopenresearch.org/articles/2-97/v1	2	97	RESEARCH_ARTICLE	1	07/04/2017	11/04/2017	12/05/2017	16/05/2017	18/05/2017	05/10/2017	16/10/2017	31/10/2017				A0, AR2, NA0	WC_2500_8000
https://wellcomeopenresearch.org/articles/2-98/v1	2	98	STUDY_PROTOCOL	1	21/09/2017	25/09/2017	27/09/2017	28/09/2017	02/10/2017	09/10/2017	23/10/2017					A1, AR0, NA0	WC_2500_8000
https://wellcomeopenresearch.org/articles/2-99/v1	2	99	RESEARCH_ARTICLE	1	05/09/2017	07/09/2017	02/10/2017	05/10/2017	09/10/2017	10/10/2017	07/11/2017					A0, AR1, NA0	WC_2500_8000
https://wellcomeopenresearch.org/articles/2-100/v1	2	100	STUDY_PROTOCOL	1	22/09/2017	26/09/2017	28/09/2017	03/10/2017	06/10/2017	11/10/2017	23/10/2017	30/10/2017				A1, AR1, NA0	WC_OVER_8000
https://wellcomeopenresearch.org/articles/2-101/v1	2	101	SYSTEMATIC_REVIEW	1	04/10/2017	06/10/2017	09/10/2017	10/10/2017	12/10/2017	17/10/2017	20/11/2017	20/11/2017				A1, AR1, NA0	WC_2500_8000
https://wellcomeopenresearch.org/articles/2-102/v1	2	102	RESEARCH_ARTICLE	1	12/10/2017	16/10/2017		19/10/2017	23/10/2017	24/10/2017	20/11/2017					A0, AR1, NA0	WC_2500_8000
https://wellcomeopenresearch.org/articles/2-103/v1	2	103	RESEARCH_ARTICLE	1	08/09/2017	13/09/2017	06/10/2017	17/10/2017	23/10/2017	24/10/2017	20/11/2017					A1, AR0, NA0	WC_2500_8000
https://wellcomeopenresearch.org/articles/2-104/v1	2	104	RESEARCH_ARTICLE	1	05/10/2017	09/10/2017	10/10/2017	18/10/2017	23/10/2017	26/10/2017	15/11/2017					A1, AR0, NA0	WC_1000_2500
https://wellcomeopenresearch.org/articles/2-105/v1	2	105	RESEARCH_ARTICLE	1	05/10/2017	09/10/2017		17/10/2017	20/10/2017	27/10/2017	30/10/2017					A0, AR1, NA0	WC_2500_8000
https://wellcomeopenresearch.org/articles/2-106/v1	2	106	RESEARCH_ARTICLE	1	08/09/2017	12/09/2017	06/10/2017	11/10/2017	11/10/2017	02/11/2017	13/11/2017					A1, AR0, NA0	WC_2500_8000
https://wellcomeopenresearch.org/articles/2-107/v1	2	107	RESEARCH_ARTICLE	1	03/10/2017	05/10/2017	16/10/2017	23/10/2017	24/10/2017	06/11/2017						A0, AR0, NA0	WC_2500_8000
https://wellcomeopenresearch.org/articles/2-108/v1	2	108	STUDY_PROTOCOL	1	27/09/2017	28/09/2017		30/10/2017	01/11/2017	06/11/2017						A0, AR0, NA0	WC_2500_8000
https://wellcomeopenresearch.org/articles/2-109/v1	2	109	RESEARCH_ARTICLE	1	14/10/2017	18/10/2017		07/11/2017	08/11/2017	10/11/2017						A0, AR0, NA0	WC_1000_2500
